# Supplementary material for: Synthesis of chromophores combining second harmonic generation and two photon induced fluorescence properties
Source: Royal Society of Chemistry journal article supplement (doi:10.1039/b610557b), 2006-01-01
Supplement: b610557b.pdf [file b610557b.pdf]

**Supporting information for:**

**Synthesis of chromophores combining second harmonic generation and two photon induced fluorescence properties.**

Cyril Barsu, Rémy Fortrie, Kamilla Nowika, Patrice Baldeck, Alberto Barsella, Alain Fort, Muriel Hissler, Yann Bretonnière, Olivier Maury,\* Chantal Andraud\*

**Characterisations of 1 and 2.**

**4-(2'-(*N,N*-dihexyl-phenyl)ethynyl-2,6-di(diethylcarbamoyl)-pyridine 1.** Mp = 101.6°C. <sup>1</sup>H NMR (CD<sub>3</sub>CN) : δ = 7.47 (s, 2H); 7.35 (d, 2H, *J* = 9 Hz); 6.64 (d, 2H, *J* = 9 Hz); 3.48 (q, 4H, *J* = 7 Hz) ; 3.3 (m, 4H); 3.3 (m, 4H); 1.55 (m, 4H); 1.3 (m, br, 12H); 1.18 (t, 6H, *J* = 7 Hz) ; 1.08 (t, 6H, *J* = 7 Hz) ; 0.88 (t, 6H, *J* = 6 Hz). <sup>13</sup>C NMR (CD<sub>3</sub>CN) : δ = 166.9; 154.2; 148.6; 133.8; 132.9; 122.2; 110.9; 105.7; 97.4; 84.0 ; 49.9; 42.4; 39.0; 30.9; 26.3 ; 25.8; 21.9; 13.1; 11.6; 12.8. FTIR 2203 cm<sup>-1</sup> (ν<sub>C≡C</sub>); 1625 cm<sup>-1</sup> (ν<sub>C=O</sub>). Elemental analysis calcd (%) for C<sub>35</sub>H<sub>52</sub>N<sub>4</sub>O<sub>2</sub>: C 74.96, H 9.35, N: 9.99; found: C 75.04, H 9.38, N 9.78.

**4-(2'-(*N,N*-dihexyl-7'-amino-9',9'-dihexylfluorene)ethynyl-2,6-di(diethylcarbamoyl)-pyridine 2.** <sup>1</sup>H NMR (CDCl<sub>3</sub>, δ) 7.68 (s, 2H), 7.51-7.38 (m, 4H), 6.59 (d, 1H, *J* = 8.6 Hz), 6.54 (s, 1H), 3.55 (q, 4H, *J* = 7.1 Hz), 3.48-3.32 (m, 8H), 1.94-1.82 (m, 4H), 1.68-1.50 (m, 4H), 1.46-0.96 (m, 36H), 0.91-0.83 (m, 6H), 0.79-0.72 (m, 10H); <sup>13</sup>C NMR (CDCl<sub>3</sub>, δ) 167.73, 153.77, 153.08, 149.91, 148.68, 143.83, 134.31, 131.21, 127.98, 126.00, 125.09, 121.09, 117.87, 116.85, 110.86, 105.99, 98.04, 85.67, 54.79, 51.46, 43.27, 40.57, 40.15, 31.76, 31.51, 29.75, 27.23, 26.86, 23.71, 22.65, 14.27, 14.03, 12.78 ; FTIR 2202 cm<sup>-1</sup> (ν<sub>C≡C</sub>); 1640 cm<sup>-1</sup> (ν<sub>C=O</sub>). Elemental analysis calcd (%) for C<sub>54</sub>H<sub>80</sub>N<sub>4</sub>O<sub>2</sub>·2H<sub>2</sub>O: C 76.01; H 9.92; N 6.57; found C 76.49; H 9.69; N 6.26.

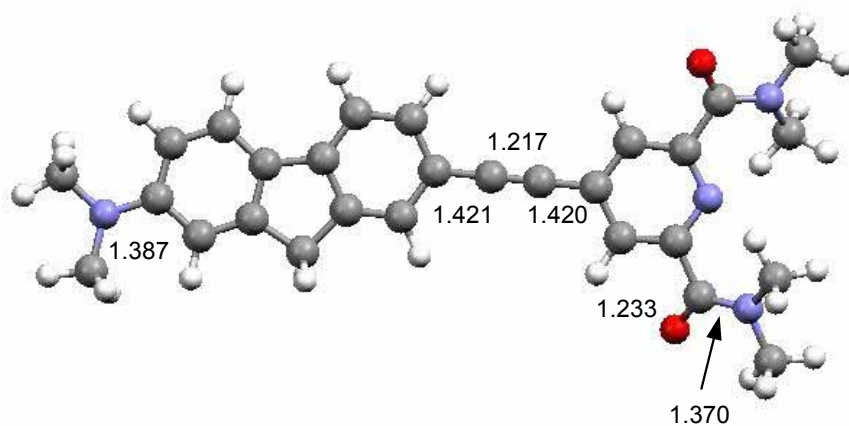

**Fig S1.** Optimized geometry of **2'** at the B3LYP/6-31G\* level of Density Functional Theory. The optimized AM1 geometry has been used as guess. Selected bond lengths are given in Angströms.

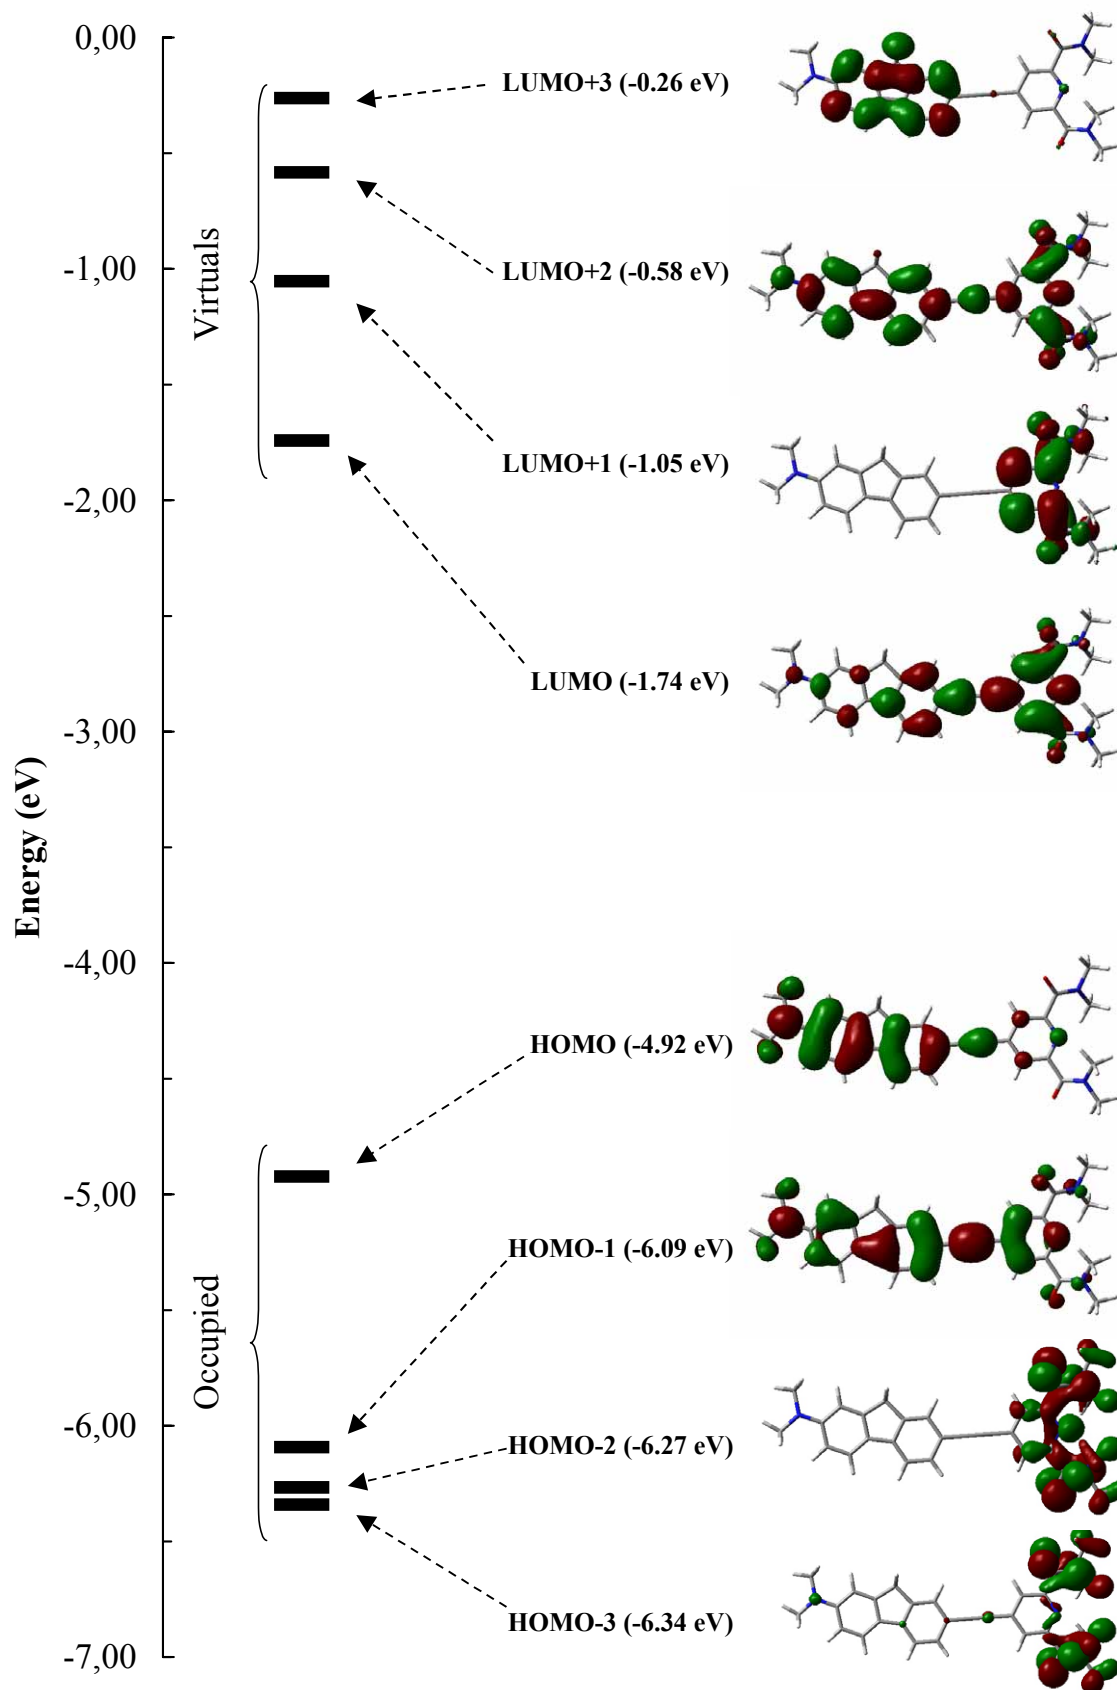

Fig S2. Kohn-Sham orbitals diagram of 2' in its optimized geometry (fig S1).

**Table S1.** Excitation spectrum of **2'** in its optimized geometry (fig S1) calculated at the B3LYP/6-31G\* level of Time-Dependent Density Functional Theory. C represents the coefficient of the current configuration in the current excited state.

| Excitation | Main contributions   |             |                | Energy (eV) | Wavelength (nm) | Oscillator strength |
|------------|----------------------|-------------|----------------|-------------|-----------------|---------------------|
|            | Configuration        | C           | C <sup>2</sup> |             |                 |                     |
| 1          | <b>HOMO → LUMO</b>   | <b>0.67</b> | <b>0.45</b>    | 2.93        | 422             | 1.02                |
| 2          | <b>HOMO → LUMO+1</b> | <b>0.69</b> | <b>0.48</b>    | 3.53        | 351             | 0.00                |
| 3          | <b>HOMO-2 → LUMO</b> | <b>0.62</b> | <b>0.38</b>    | 3.87        | 320             | 0.01                |
|            | HOMO-4 → LUMO        | 0.21        | 0.04           |             |                 |                     |
|            | HOMO-8 → LUMO        | -0.13       | 0.02           |             |                 |                     |
| 4          | <b>HOMO-1 → LUMO</b> | <b>0.50</b> | <b>0.25</b>    | 3.93        | 315             | 0.65                |
|            | HOMO → LUMO+2        | 0.38        | 0.14           |             |                 |                     |
|            | HOMO-3 → LUMO        | 0.19        | 0.04           |             |                 |                     |
|            | HOMO → LUMO+3        | 0.12        | 0.01           |             |                 |                     |
| 5          | <b>HOMO → LUMO+3</b> | <b>0.45</b> | <b>0.20</b>    | 3.94        | 314             | 0.03                |
|            | <b>HOMO-3 → LUMO</b> | <b>0.42</b> | <b>0.18</b>    |             |                 |                     |
|            | HOMO → LUMO+2        | 0.21        | 0.04           |             |                 |                     |
|            | HOMO-7 → LUMO        | 0.13        | 0.02           |             |                 |                     |
| 6          | <b>HOMO → LUMO+3</b> | <b>0.45</b> | <b>0.20</b>    | 4.01        | 309             | 0.19                |
|            | <b>HOMO-3 → LUMO</b> | <b>0.43</b> | <b>0.18</b>    |             |                 |                     |
|            | HOMO → LUMO+2        | -0.20       | 0.04           |             |                 |                     |
|            | HOMO-1 → LUMO        | -0.14       | 0.02           |             |                 |                     |
| 7          | <b>HOMO-4 → LUMO</b> | <b>0.60</b> | <b>0.36</b>    | 4.04        | 307             | 0.01                |
|            | HOMO-2 → LUMO        | -0.26       | 0.07           |             |                 |                     |
|            | HOMO-1 → LUMO+1      | -0.10       | 0.01           |             |                 |                     |
| 8          | <b>HOMO → LUMO+2</b> | <b>0.43</b> | <b>0.18</b>    | 4.08        | 304             | 0.01                |
|            | HOMO-1 → LUMO        | -0.33       | 0.11           |             |                 |                     |
|            | HOMO-3 → LUMO        | 0.25        | 0.06           |             |                 |                     |
|            | HOMO-6 → LUMO        | -0.19       | 0.04           |             |                 |                     |
|            | HOMO → LUMO+3        | -0.12       | 0.01           |             |                 |                     |
| 9          | <b>HOMO-6 → LUMO</b> | <b>0.54</b> | <b>0.29</b>    | 4.13        | 300             | 0.00                |
|            | HOMO-2 → LUMO+1      | -0.24       | 0.06           |             |                 |                     |
|            | HOMO-1 → LUMO        | -0.20       | 0.04           |             |                 |                     |
|            | HOMO-4 → LUMO+1      | -0.15       | 0.02           |             |                 |                     |
|            | HOMO → LUMO+2        | 0.13        | 0.02           |             |                 |                     |
| 10         | <b>HOMO-5 → LUMO</b> | <b>0.56</b> | <b>0.31</b>    | 4.15        | 299             | 0.00                |
|            | HOMO → LUMO+4        | 0.33        | 0.11           |             |                 |                     |
|            | HOMO-7 → LUMO        | -0.13       | 0.02           |             |                 |                     |
|            | HOMO-5 → LUMO+4      | -0.12       | 0.01           |             |                 |                     |

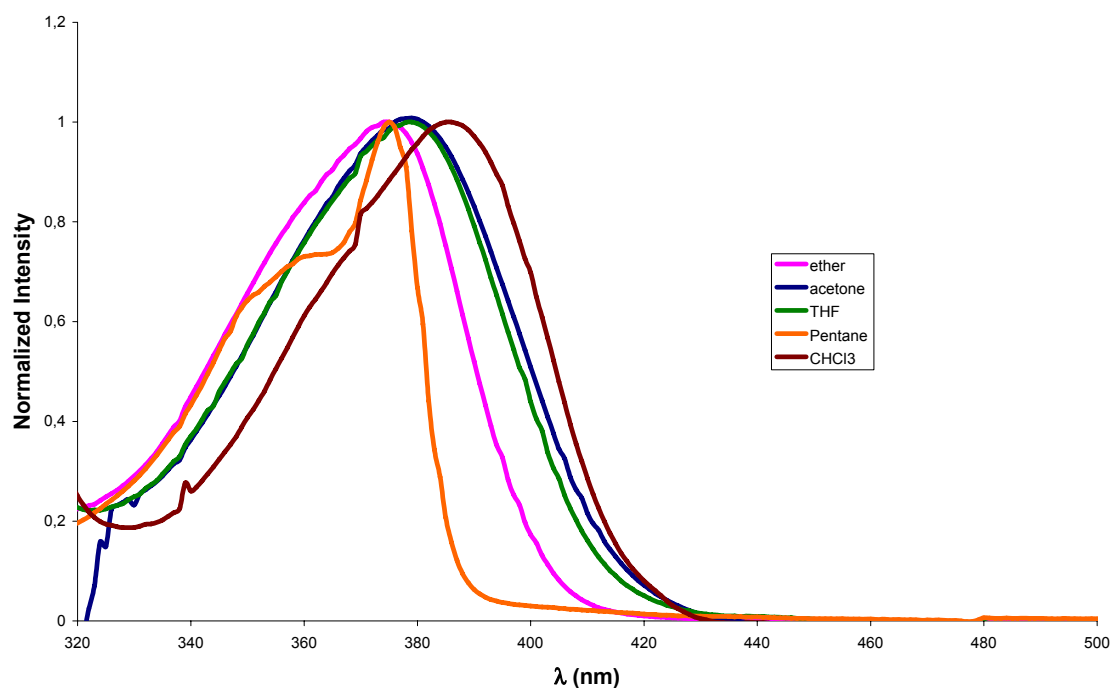

**Fig S3.** Solvatochromism in absorption in the case of **1**.

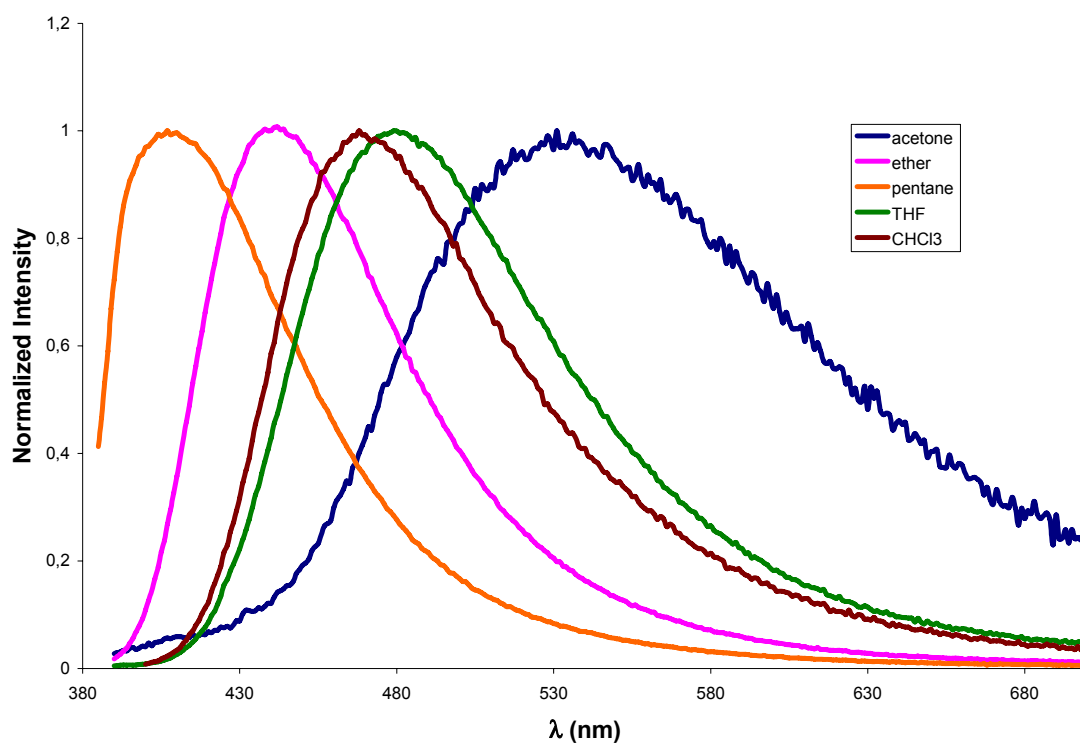

**Fig S4.** Solvatochromism in emission in the case of **1**.

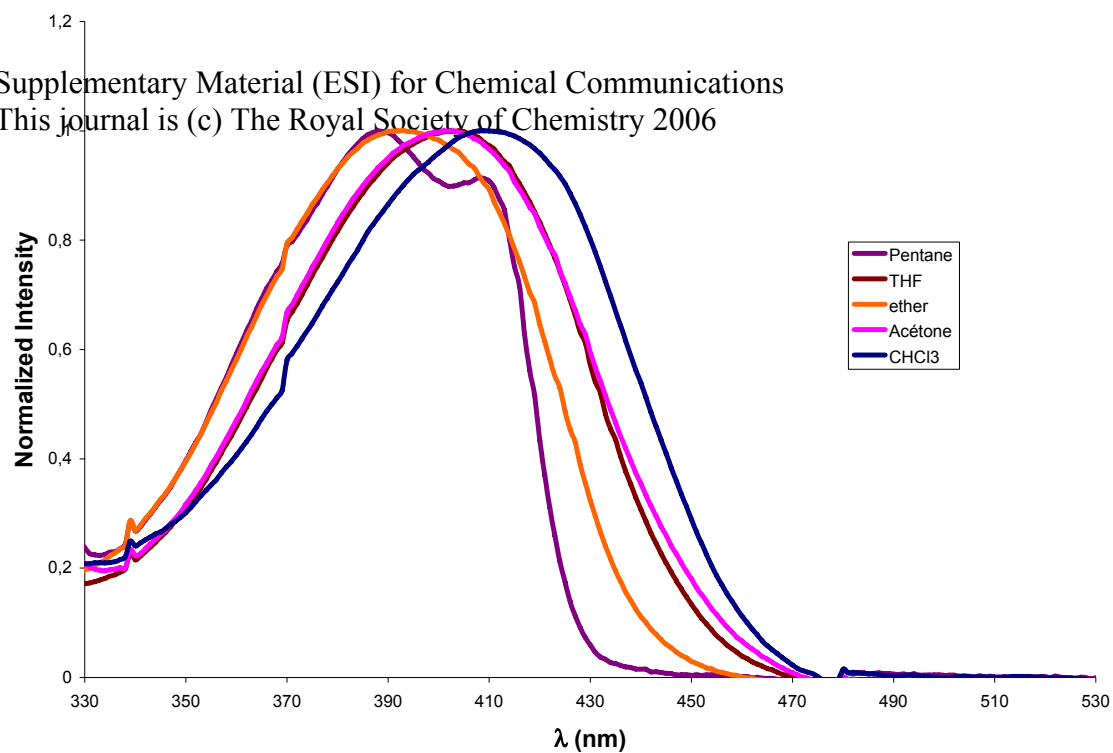

Fig S5. Solvatochromism in absorption in the case of 2.

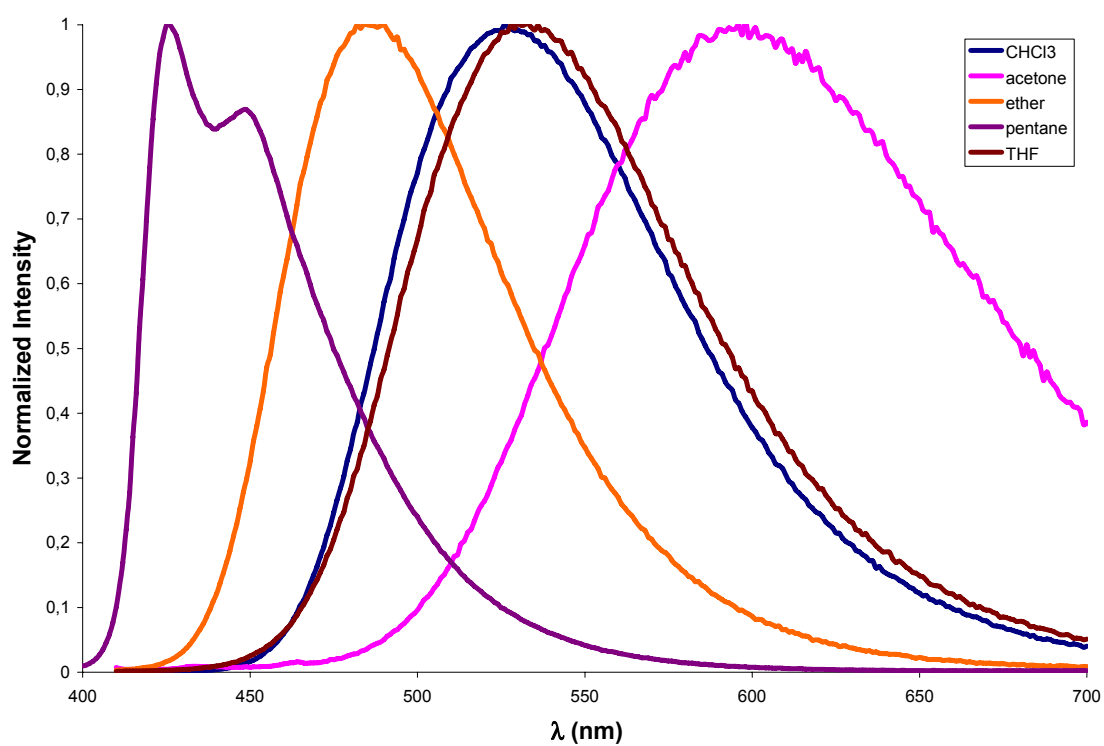

Fig S6. . Solvatochromism in emission in the case of 2.
